# Supplementary material for: Catecholamines Facilitate Fuel Expenditure and Protect Against Obesity via a Novel Network of the Gut-Brain Axis in Transcription Factor Skn-1-deficient Mice
Source: PubMed Central journal article supplement — eBioMedicine. 2016 Apr 30;8:60–71. doi: 10.1016/j.ebiom.2016.04.031 (PMC4919597; doi:10.1016/j.ebiom.2016.04.031), 2016-04-30
Supplement: mmc1.pdf [file mmc1.pdf]

## Supplemental Material

### Supplemental Figure Legends

#### Supplemental Fig. 1. Brush Cells Are Eliminated in the GI Tract of *Skn-1* KO Mice

(a) Immunostaining revealed that the Trpm5 protein was present in the duodenum of WT mice (upper panel) but absent in *Skn-1* KO mice (lower panel). By contrast, of ChgA and GLP-1 signals were observed in WT (upper panels) and *Skn-1* KO mice (lower panels). Arrowheads indicate signals.

(b) Double immunostaining indicated that nearly all Trpm5-positive cells were also positive for Dclk1. Arrows indicate cells expressing Trpm5 and Dclk1. Scale bars: 100  $\mu\text{m}$ .

#### Supplemental Fig. 2. Metabolic Phenotypes of *Skn-1* KO Mice Fed a Normal Chow Diet

(a) Although body weight at birth did not differ significantly between *Skn-1* KO and WT littermates (n=60–62), *Skn-1* KO mice exhibited lower body weight than WT littermates at 3 weeks of age under normal chow diet conditions (n=25–33).

(b) There were no significant differences in RER between *Skn-1* KO and WT littermates (n=8–9).

(c) There were no significant differences in spontaneous motor activity between *Skn-1* KO and WT littermates (n=8–9). The data are presented as the mean  $\pm$  SEM; \*p<0.05.

#### Supplemental Fig. 3. Metabolic Phenotypes of *Skn-1* KO Mice Fed a High-Fat Diet

No differences in food intake (n=8-10) (a), fecal triacylglycerol (n=8-10) (b), or fecal energy (n=5-9) (c) were observed between *Skn-1* KO and WT littermates at 15 weeks of

age. The data are presented as the mean  $\pm$  SEM.

**Supplemental Fig. 4.** Expression of Catecholamine Biosynthetic Enzymes in the Adrenal Gland

qRT-PCR analysis revealed that gene expression of catecholamine biosynthetic enzymes, including tyrosine hydroxylase (Th), dopa decarboxylase (Ddc), dopamine- $\beta$ -hydroxylase (Dbh), and phenylethanolamine N-methyltransferase (Pnmt), in the adrenal gland was comparable between *Skn-1* KO and WT littermates (n=5). The data are presented as the mean  $\pm$  SEM.

**Supplemental Fig. 5.** Insulin Secretion and Insulin Resistance in *Skn-1* KO Mice Fed a Normal Chow Diet

(a) Plasma total GIP was comparable between *Skn-1* KO and WT littermates for 60 min after glucose gavage (3.0 mg/g of body weight) (n=6–7).

(b) Plasma active GLP-1 was comparable between *Skn-1* KO and WT littermates for 40 min after glucose gavage (5.0 mg/g of body weight) (n=6–7).

(c) Insulin secretion from isolated islets in response to 25 mM glucose was comparable between *Skn-1* KO and WT littermates (n=10).

(d and e) Blood glucose (d) and plasma insulin (e) after intraperitoneal administration of glucose (1.5 mg/g of body weight). Blood glucose was comparable between *Skn-1* KO and WT littermates for 120 min after administration (n=10–13) (d). Plasma insulin was also comparable between *Skn-1* KO and WT littermates before and 15 min after administration (n=17–20) (e).

(f) ITT revealed that insulin resistance was comparable in *Skn-1* KO and WT littermates

(n=12). The data are presented as the mean  $\pm$  SEM.

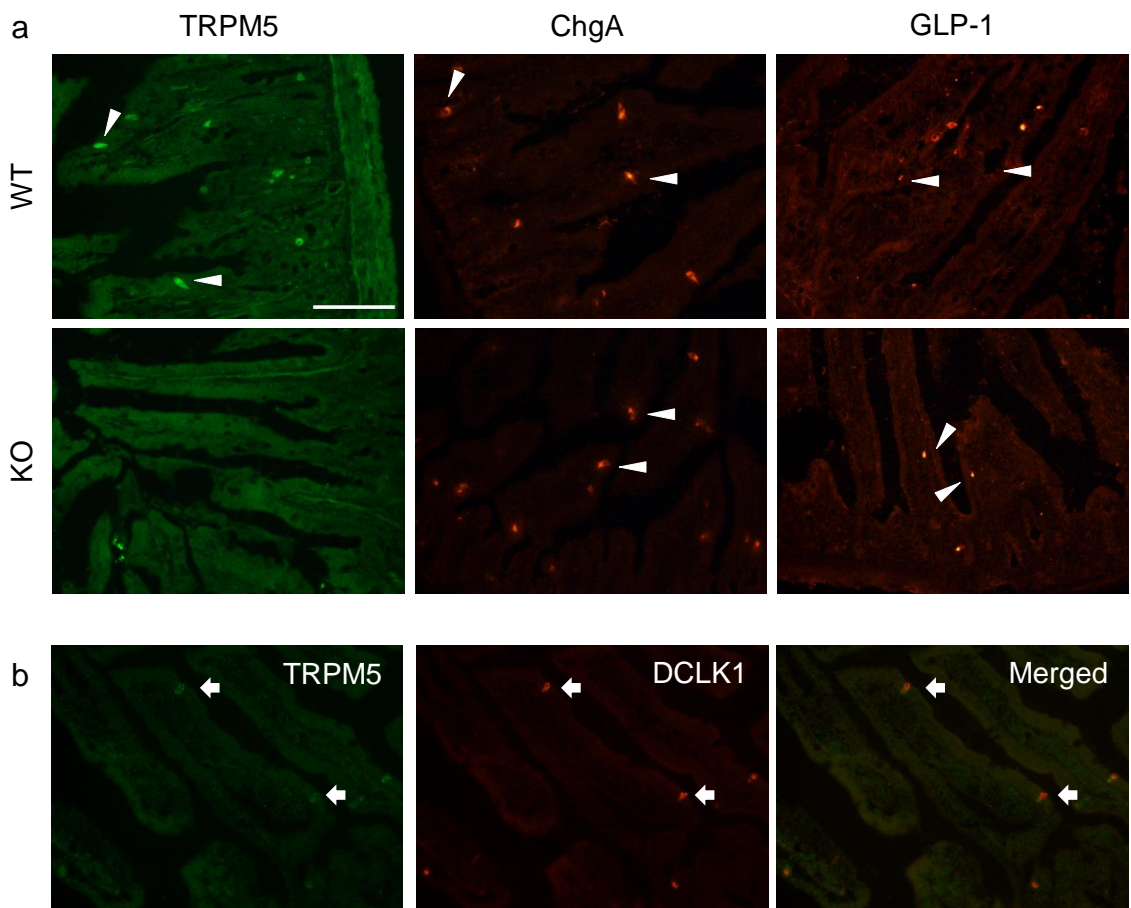

Figure S1 Ushiyama et al.

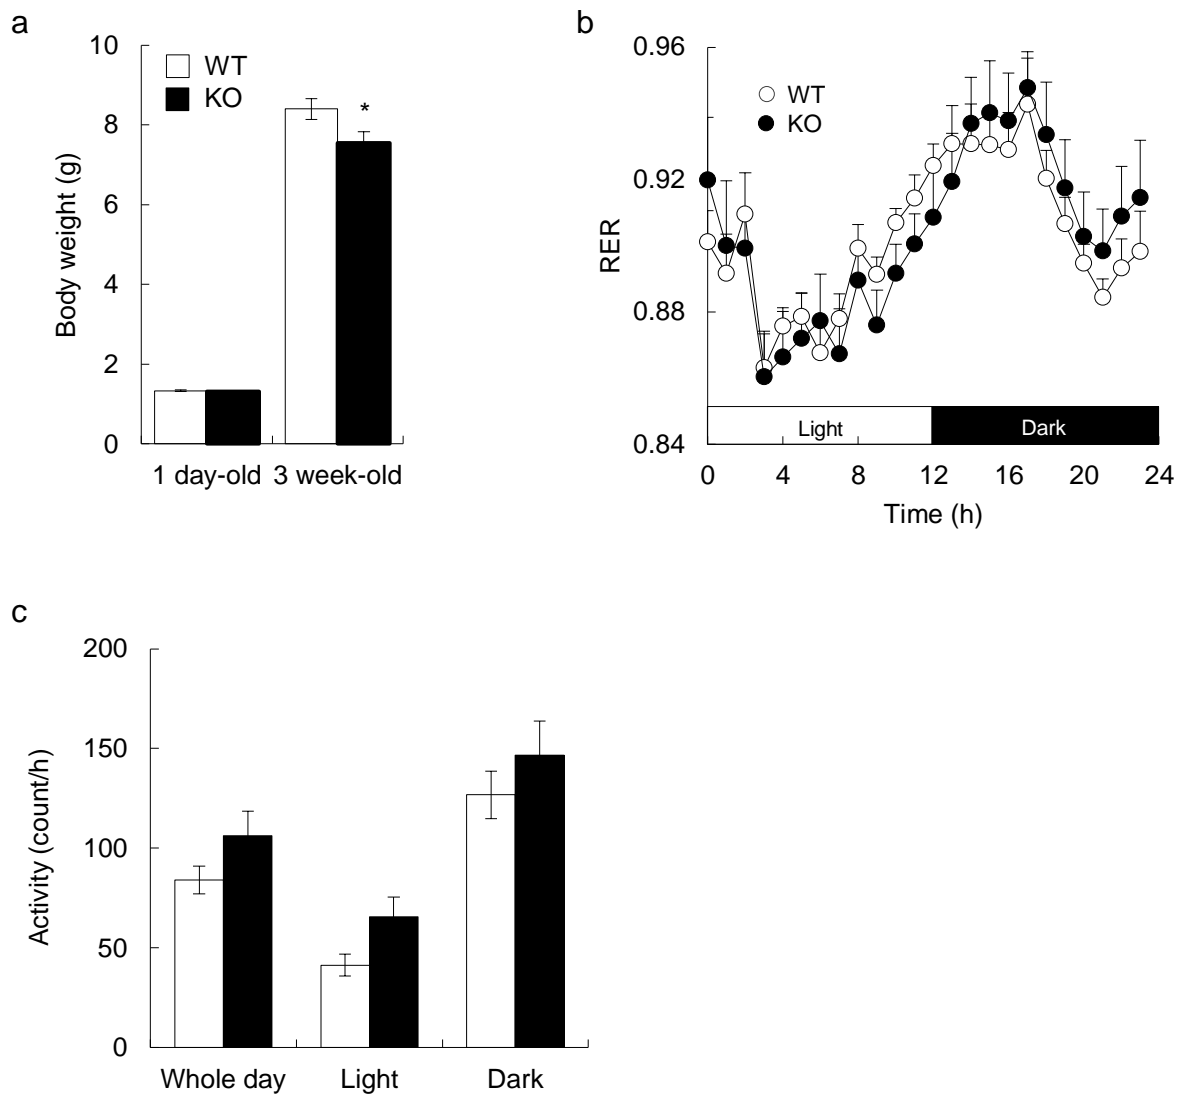

Figure S2 Ushiyama et al.

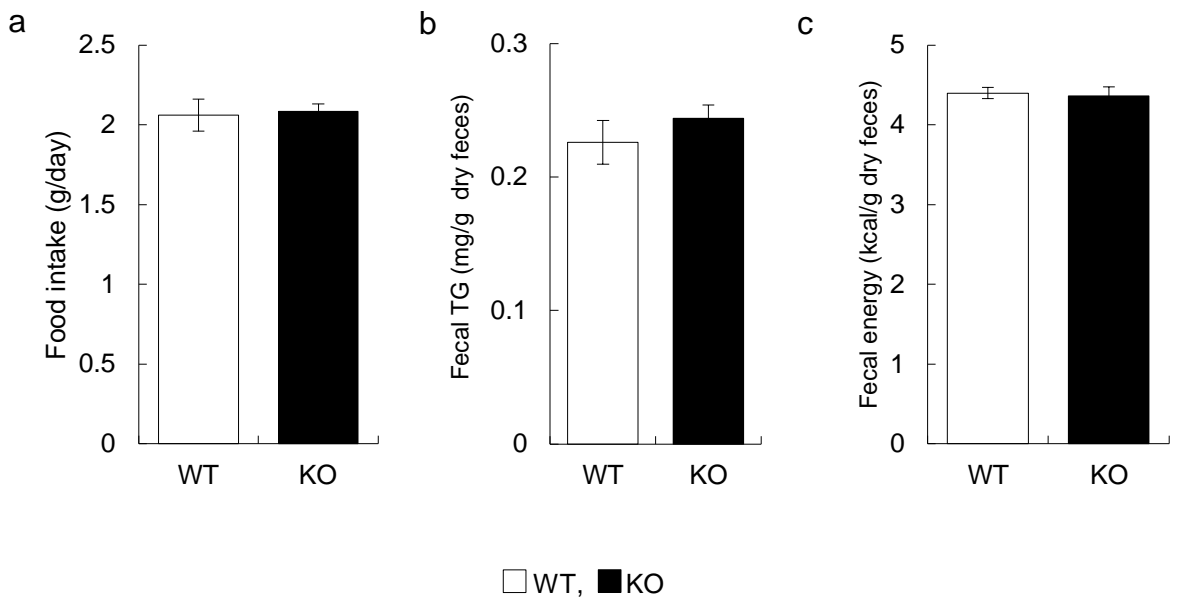

Figure S3 Ushiyama et al.

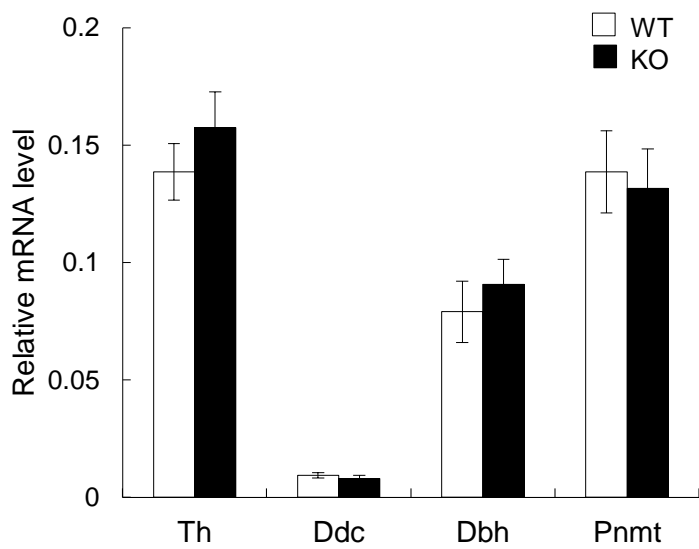

Figure S4 Ushiana et al.

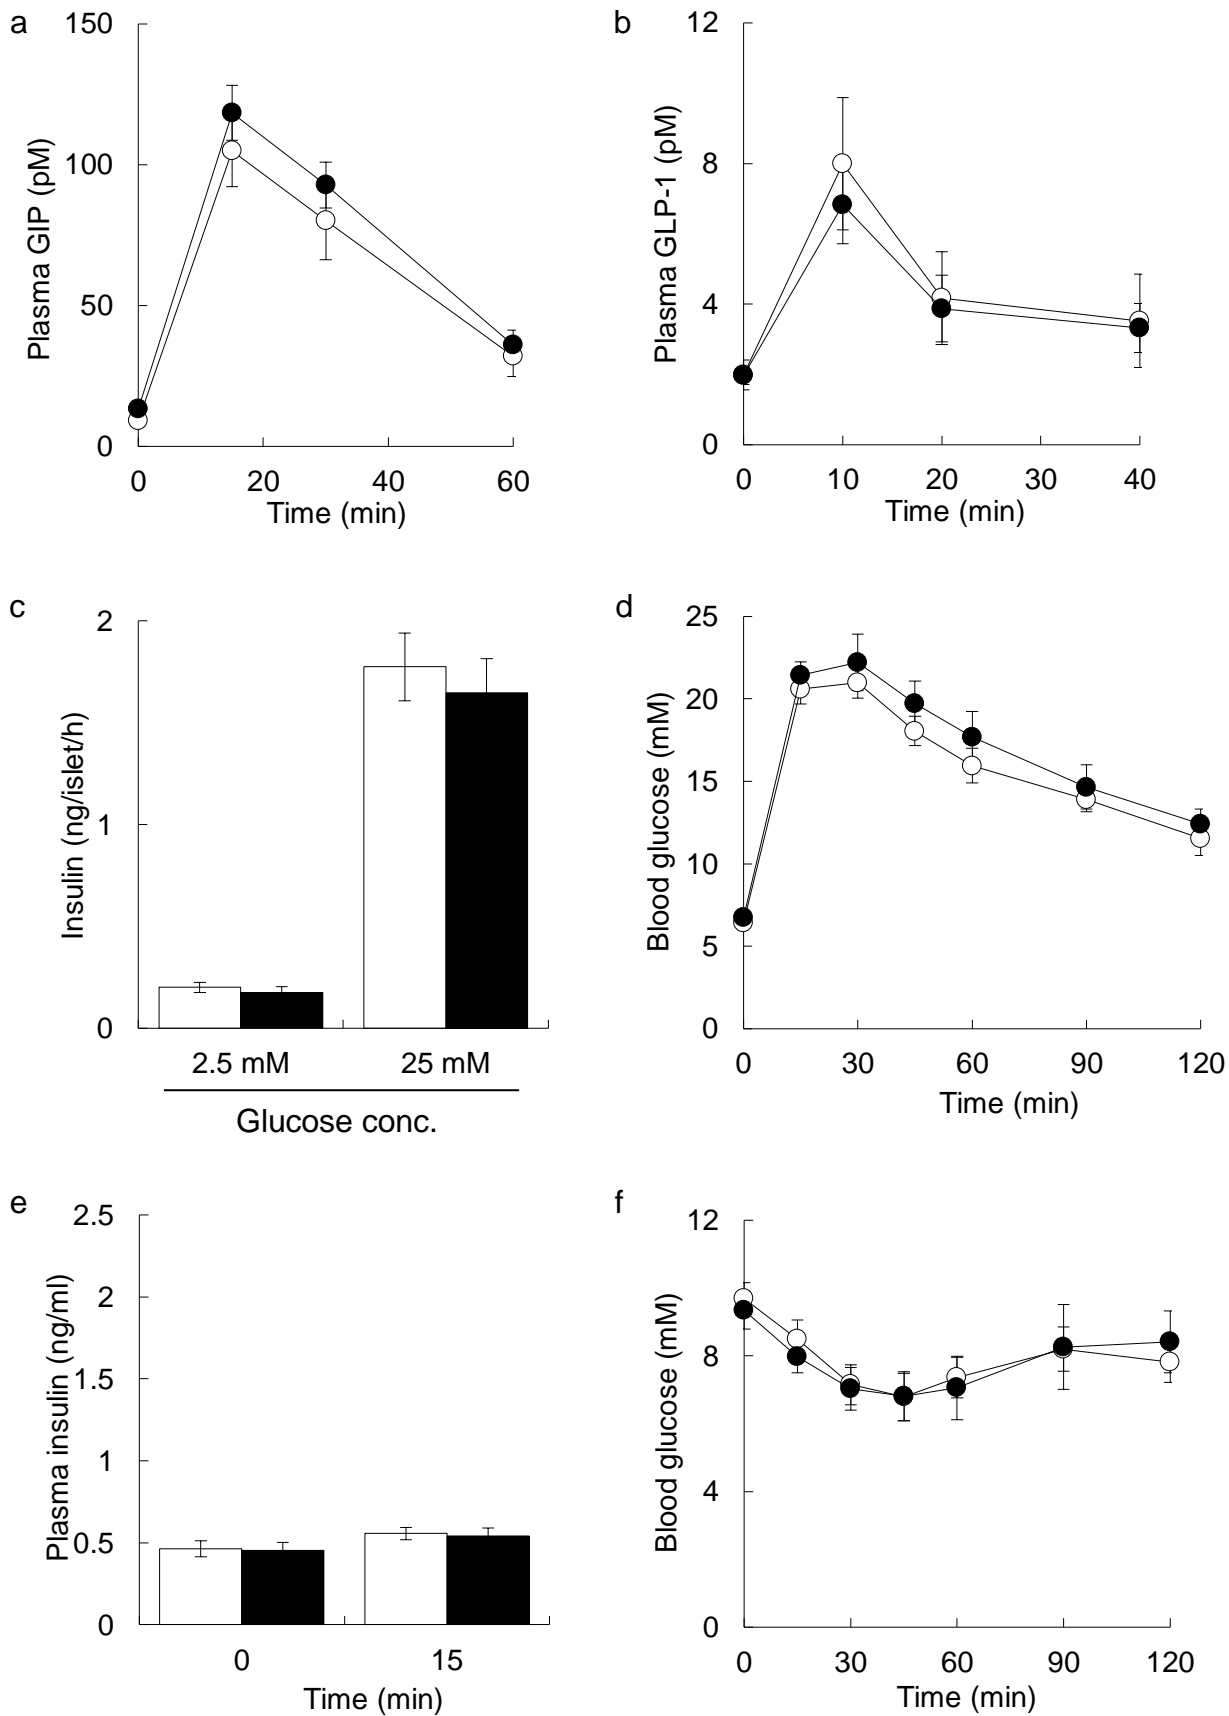

○/□ WT, ●/■ KO

Figure S5 Ushima et al.



Table S1 Blood serum components of CD-fed animals under ad lib feeding schedule

|                      | WT (n=28) | KO (n=18) |
|----------------------|-----------|-----------|
| Total protein (g/dL) | 5.1 ± 0.1 | 5.3 ± 0.1 |
| AST (IU/L)           | 184 ± 21  | 181 ± 22  |
| ALT (IU/L)           | 40 ± 3    | 40 ± 3    |
| ALP (IU/L)           | 221 ± 10  | 241 ± 15  |
| LDH (IU/L)           | 528 ± 38  | 599 ± 72  |
| T-CHO (mg/dL)        | 103 ± 6   | 118 ± 7   |
| F-CHO (mg/dL)        | 28 ± 1    | 32 ± 2*   |
| E-CHO (mg/dL)        | 75 ± 5    | 86 ± 6    |
| Total lipid (mg/dL)  | 354 ± 25  | 412 ± 33  |
| Triglyceride (mg/dL) | 105 ± 13  | 124 ± 17  |
| NEFA (μEq/L)         | 454 ± 35  | 515 ± 41  |
| Glucose (mg/dL)      | 203 ± 8   | 182 ± 10  |

\* indicates p < 0.05.

Table S2 Blood serum components of CD-fed animals under fasting schedule

|                      | WT (n=13) | KO (n=13)  |
|----------------------|-----------|------------|
| Total protein (g/dL) | 5.3 ± 0.0 | 5.1 ± 0.1  |
| AST (IU/L)           | 195 ± 23  | 214 ± 18   |
| ALT (IU/L)           | 40 ± 3    | 46 ± 2     |
| ALP (IU/L)           | 350 ± 21  | 447 ± 18** |
| LDH (IU/L)           | 544 ± 46  | 529 ± 41   |
| T-CHO (mg/dL)        | 98 ± 3    | 98 ± 2     |
| F-CHO (mg/dL)        | 29 ± 1    | 29 ± 1     |
| E-CHO (mg/dL)        | 70 ± 2    | 70 ± 2     |
| Total lipid (mg/dL)  | 326 ± 7   | 349 ± 12   |
| Triglyceride (mg/dL) | 94 ± 8    | 107 ± 10   |
| NEFA (μEq/L)         | 772 ± 43  | 871 ± 35   |
| Glucose (mg/dL)      | 83 ± 4    | 77 ± 5     |

\*\* indicates  $p < 0.01$ .

Table S3 Weight of various organs in HFD fed animals

|            | Organ weight (mg/g BW) |            |
|------------|------------------------|------------|
|            | WT (n=6)               | KO (n=12)  |
| Liver      | 45.5 ± 4.6             | 52.1 ± 1.7 |
| Spleen     | 2.7 ± 0.2              | 2.7 ± 0.1  |
| Pancreas   | 8.7 ± 1.0              | 8.1 ± 0.6  |
| Kidney     | 9.1 ± 3.5              | 7.4 ± 0.6  |
| BAT        | 4.9 ± 0.3              | 4.3 ± 0.2  |
| Thigh bone | 2.5 ± 0.1              | 2.4 ± 0.1  |

Table S4 Plasma hormones of HFD-fed animals

|                                  | WT (n=8)        | KO (n=7)        |
|----------------------------------|-----------------|-----------------|
| Adiponectin ( $\mu\text{g/mL}$ ) | $13.4 \pm 1.7$  | $11.5 \pm 0.9$  |
| FGF21 ( $\text{ng/mL}$ )         | $0.93 \pm 0.18$ | $0.57 \pm 0.33$ |
| Insulin ( $\text{ng/mL}$ )       | $1.99 \pm 0.60$ | $1.27 \pm 0.39$ |
| Leptin ( $\text{ng/mL}$ )        | $2.59 \pm 0.99$ | $0.55 \pm 0.17$ |
